## Correspondence

## XDR-TB in South Africa: Back to TB Sanatoria Perhaps?

### Ramalitse Sakoane

It is only about 25 years since the abolition or abandonment of TB sanatoria in South Africa. It is likely that there are people in South Africa who are familiar with the idea of isolation of TB patients from the general public emanating from the era of TB sanatoria, and it is conceivable that they are likely to be understanding of the reasons that were used to keep patients there during their treatment.

These people could help to make the idea of isolation in sanatoria acceptable again to the general public. Anyway, the TB sanatoria of this era were rightfully regarded as hospitals, as indeed they were, and I cannot see why modern day sanatoria should be viewed any differently. Granted, with the likelihood that the patients detained in these envisaged isolation areas may be more likely to die than be discharged, it will be a mammoth task to convince the “detainees” to stay there or their families to allow them to be kept there, especially if they are minors or the elderly infirm. It is a tough call but it is worth a try.

The South African government owes it to the South African public to explore this idea or one along these lines. There is no time for chickening out on this XDR-TB issue [1]. ■

Ramalitse Sakoane (r.sakoane@doctors.org.uk)

Norfolk and Norwich University Hospital  
Norwich, United Kingdom

### References

1. Singh JA, Upshur R, Padayatchi N (2007) XDR-TB in South Africa: No time for denial or complacency. *PLoS Med* 4: e50. doi:10.1371/journal.pmed.0040050

**Citation:** Sakoane R (2007) XDR-TB in South Africa: Back to TB sanatoria perhaps? *PLoS Med* 4(4): e160. doi:10.1371/journal.pmed.0040160

**Copyright:** © 2007 Ramalitse Sakoane. This is an open-access article distributed under the terms of the Creative Commons Attribution License, which permits unrestricted use, distribution, and reproduction in any medium, provided the original author and source are credited.

**Funding:** The author received no specific funding for this article.

**Competing Interests:** The author has declared that no competing interests exist.

## XDR-TB in South Africa: Revised Definition

### Timothy H. Holtz

The authors should be commended for a thoughtful and stimulating article [1]. However, we wish to clarify the historical record about the use of the term XDR-TB. The concept of XDR-TB as a distinct nosological entity was first developed at the Centers for Disease Control and Prevention (CDC) in March 2005 and introduced into public use in October 2005 at the 36th World Conference on Lung Health in Paris [2,3]. At that meeting, data on second-line drug resistance from a global survey of supranational TB reference laboratories conducted by CDC and the World Health Organization, as well as treatment outcomes of XDR-TB patients in Latvia, were first presented. Shortly thereafter, the cluster of TB deaths with resistance to second-line drugs

in HIV-infected persons in KwaZulu-Natal was presented at the 13th Conference on Retroviruses and Opportunistic Infections in Denver in February 2006 [4]. The original definition for XDR-TB published in the *Morbidity and Mortality Weekly Report* in March 2006 [5] that they have used, however, was revised in October 2006 at an emergency meeting of the Global XDR-TB Task Force. The revised definition was published on November 3, 2006 in an MMWR notice to readers [6]. Currently, XDR-TB is defined as the occurrence of TB in persons whose *Mycobacterium tuberculosis* isolates are resistant to isoniazid and rifampin plus any fluoroquinolone and at least one of the three injectable second-line drugs (amikacin, kanamycin, capreomycin). The definition was revised because drug susceptibility testing to these drugs produces reliable and reproducible results, and is more accessible in resource-limited settings. In addition, patients meeting the revised definition have significantly poorer treatment outcomes. The new definition is important for those intending to conduct surveillance for XDR-TB in their setting. ■

Timothy H. Holtz (tholtz@cdc.gov)

Centers for Disease Control and Prevention  
Atlanta, Georgia, United States of America.

### References

1. Singh JA, Upshur R, Padayatchi N (2007) XDR-TB in South Africa: No time for denial or complacency. *PLoS Med* 4: e50. doi:10.1371/journal.pmed.0040050
2. Shah NS, Wright A, Drobniewski F, et al. (2005) Extreme drug resistance in tuberculosis (XDR-TB): Global survey of supranational reference laboratories for *Mycobacterium tuberculosis* with resistance to second-line drugs. *Int J Tuberc Lung Dis* 9 (Suppl 1): S77.
3. Holtz TH, Riektsina V, Zarovska E, Laserson KF, Wells CD, et al. (2005) XDR-TB: Extreme drug-resistance and treatment outcome under DOTS-Plus, Latvia, 2000–2002. *Int J Tuberc Lung Dis* 9 (Suppl 1): S258.
4. Moll A, Gandhi NR, Pawinski R, Andrews J, Zeller K, et al. (2006) Identification of a multidrug-resistant tuberculosis cluster as a cause of death among HIV coinfecting patients in rural South Africa. 13th Conference on Retroviruses and Opportunistic Infections; 7 February 2006; Denver, Colorado, United States of America. Poster O-115.
5. Centers for Disease Control and Prevention (CDC) (2006) Emergence of *Mycobacterium tuberculosis* with extensive resistance to second-line drugs—Worldwide, 2000–2004. *MMWR Morb Mortal Wkly Rep* 55: 301–305.
6. Centers for Disease Control and Prevention (CDC) (2006) Notice to readers: Revised definition of extensively drug-resistant tuberculosis. *MMWR Morb Mortal Wkly Rep* 55: 1176.

**Citation:** Holtz TH (2007) XDR-TB in South Africa: Revised definition. *PLoS Med* 4(4): e161. doi:10.1371/journal.pmed.0040161

**Copyright:** This is an open-access article distributed under the terms of the Creative Commons Public Domain declaration which stipulates that, once placed in the public domain, this work may be freely reproduced, distributed, transmitted, modified, built upon, or otherwise used by anyone for any lawful purpose.

**Funding:** The author received no specific funding for this article.

**Competing Interests:** The author has declared that no competing interests exist.

## XDR-TB in South Africa: Theory and Practice

### Jason Andrews, Sanjay Basu, David Scales, Duncan Smith-Rohrberg Maru, Ramnath Subbaraman

Singh and colleagues [1] highlight safeguards against the spread of XDR-TB and suggest “involuntary detention” as a key infection control measure. Yet several important elements of the current response to XDR-TB may make the application

of enforced confinement ineffective and inappropriate as part of the initial response to this problem.

One irony of this discussion is that patients diagnosed with drug-resistant TB in KwaZulu-Natal are being turned away from the referral hospitals where second-line therapy takes place. There is a waiting list of more than 70 patients for admission to King George V Hospital, where the majority of MDR-TB therapy is provided. Rather than keeping patients “in”—the debate posed in this article—the reality is that health services are unable to accommodate the burden of MDR-TB patients seeking care.

The authors cite United States policies during MDR-TB outbreaks as evidence of the success of detention but fail to note that US confinement measures were rarely invoked. The New York City Tuberculosis Working Group concluded: “It is unethical, illegal, and bad public health policy to detain ‘noncompliant’ persons before making concerted efforts to address the numerous systemic deficiencies that make adherence to treatment virtually impossible” [2]. Thus, patients were first offered directly observed therapy as outpatients. Among the few patients cited as non-adherent, less than half were detained. Monetary incentives and transportation vouchers were provided for outpatients, as well as housing to the homeless [3]. In contrast, many MDR-TB patients in KwaZulu-Natal must travel several hours monthly to receive treatment.

It is estimated that the South African government will spend 15 billion rand (~US\$1.9 billion) for the upcoming World Cup, much of it for building stadiums [4]. Yet, while the largest outbreak of XDR-TB ever recorded is unfolding, little appropriate investment has been made. Purchasing trailer homes as isolation facilities, providing particulate respirator masks in all hospitals, and instituting other basic infection control procedures is immediately necessary. Framing the debate about forced confinement in terms of individual liberty versus threat to society neglects the true injustice taking place.

While Singh and colleagues discuss the importance of “reciprocity,” they fail to mention the most important reciprocity obligation of those instituting confinement: providing the proper standard of medical care to detained patients. At present, many XDR-TB patients are provided therapy that includes only two active agents—a recipe for amplification of resistance. While XDR-TB patients elsewhere have been successfully treated with other regimens [5], the majority of South African patients have yet to access many second-line drugs, including capreomycin, moxifloxacin, para-aminosalicylic acid, or adjunctive thoracic surgery. Without these, they are left to die without a fighting chance, two years after this outbreak was first reported. The intent of detention in the US was to provide short inpatient stays and curative therapy. The median period of detention was three weeks, and only 2% of patients died from tuberculosis [3]. In South Africa, XDR-TB is nearly universally fatal under current treatments, and detention would presumably be sustained until death. Our willingness to respond to the realities of patient needs, rather than to abstract theories, will determine the success of the response to XDR-TB. ■

Jason Andrews (jason.andrews@yale.edu)

Sanjay Basu

David Scales

Duncan Smith-Rohrberg Maru

Ramnath Subbaraman

Yale University School of Medicine

New Haven, Connecticut, United States of America

#### References

1. Singh JA, Upshur R, Padayatchi N (2007) XDR-TB in South Africa: No time for denial or complacency. *PLoS Med* 4: e50. doi:10.1371/journal.pmed.0040050
2. New York City Tuberculosis Working Group (1992) Developing a system for tuberculosis prevention and care in New York City. New York: United Hospital Fund.
3. Gasner MR, Maw KL, Feldman GE, Fujiwara PI, Frieden TR (1999) The use of legal action in New York City to ensure treatment of tuberculosis. *New Engl J Med* 340: 359–366.
4. Nullis C (2006 October 25) South Africa to spend \$1.9B on World Cup. The Associated Press. Available: <http://www.washingtonpost.com/wp-dyn/content/article/2006/10/25/AR2006102501178.html>. Accessed 16 March 2007.
5. Leimane V (2006) MDR-TB and XDR-TB: Management and treatment outcomes in Latvia [presentation]. 37th Union World Conference on Lung Health; 31 October – 4 November 2006; Paris, France.

**Citation:** Andrews J, Basu S, Scales D, Smith-Rohrberg Maru D, Subbaraman R (2007) XDR-TB in South Africa: Theory and practice. *PLoS Med* 4(4): e163. doi:10.1371/journal.pmed.0040163

**Copyright:** © 2007 Andrews et al. This is an open-access article distributed under the terms of the Creative Commons Attribution License, which permits unrestricted use, distribution, and reproduction in any medium, provided the original author and source are credited.

**Funding:** The authors received no specific funding for this article.

**Competing Interests:** The authors have declared that no competing interests exist.

## XDR-TB in South Africa: Detention Is Not the Priority

**Eric Goemaere, Nathan Ford, Daniel Berman,  
Cheryl McDermid, Rachel Cohen**

We agree that there is “no time for denial or complacency” when it comes to the spread of MDR- and XDR-TB in South Africa. Unfortunately, the attention the recent *PLoS Medicine* article [1] generated in South Africa and internationally has overwhelmingly focused on detention of patients. Headlines such as “South Africa urged to isolate ‘killer’ TB patients” [2] place the blame on patients and divert attention from more urgent priorities.

The TB epidemic in South Africa, as across sub-Saharan Africa, is largely linked to HIV. In Khayelitsha Township near Cape Town, new cases had risen to around 2,000 per 100,000 in 2006, fuelled by the high prevalence of HIV. From our experience in South Africa, a number of challenges must be addressed locally and nationally to curb MDR-TB. Detention does not come high on this list.

Effective MDR-TB management requires improvements in general TB control, but this alone will not remove the need to respond to MDR-TB. The Western Cape has the best TB outcomes in South Africa, thanks to enormous investments in TB control, but despite this MDR- and XDR-TB cases are increasingly being reported. There is an urgent priority for infection control, taking into account the context of limited resources at the primary care level and high HIV prevalence. Data from mid-2006 show that 67% of TB patients in Khayelitsha are HIV positive; in Médecins Sans Frontières’ programme in Lesotho the figure rises to 92%. Patient triage is one aspect, but the reality is that undiagnosed MDR- and XDR-TB patients with HIV are sitting in overcrowded waiting

rooms next to other immunocompromised patients. Personal protection for health staff, starting with basic training on infection control, needs to be improved. Structural improvements to the clinics need to be based on feasible, low-tech solutions—air extractors and windows will be more practical than UV lights and negative pressure rooms [3].

Access to points of care needs to increase. The Western Cape has reported over 800 cases of MDR-TB in the last two years and this is certainly an underestimation. Greater diagnostic capacity and more rapid diagnosis is needed, and diagnosis must be met with better access to treatment. Treating MDR-TB currently relies on hospitalization of patients, but current needs are far greater than hospital capacity—patients can wait up to four months for a hospital bed. The traditional model of leaving MDR-TB management to specialists has incapacitated health-care staff at the primary care level who receive little or no training on how to manage MDR-TB. In other settings in southern Africa the situation is even worse. In Lesotho there is practically no access to reliable culture or drug-sensitivity testing. Given the scarcity of human resources and the overwhelming number of co-infected patients, treatment needs to be delivered in a decentralized manner as possible.

In settings where clinics are saturated and patient numbers are rising, it is not realistic to rely on a strategy of simply reinforcing directly observed treatment and incarcerating defaulters to respond to MDR-TB. We need to apply the lessons learnt from providing HIV care in resource-poor settings, including decentralization of services to the primary care level, reinforcing adherence through treatment literacy and a patient-centred approach, and community-based support. The reality, though, is that an integrated approach to HIV and TB is far away: around a third of MDR-TB patients in Khayelitsha do not even know their HIV status.

Drug-resistant TB is not a new problem. What is new is the willingness to detect and treat it. The lack of willingness to do so until recently has left us with old drugs and diagnostics that make treating drug-resistant TB at best highly complex and resource intensive, and at worst impossible. Programme-level improvements have to be met with a dramatic increase in efforts to develop new drugs and diagnostics [4]. ■

Eric Goemaere (goemaere@mweb.co.za)

Nathan Ford

Daniel Berman

Cheryl McDermid

Rachel Cohen

Médecins Sans Frontières  
Cape Town, South Africa

## References

1. Singh JA, Upshur R, Padayatchi N (2007) XDR-TB in South Africa: No time for denial or complacency. *PLoS Med* 4: e50. doi:10.1371/journal.pmed.0040050
2. McGregor S (2007 January 22) South Africa urged to isolate “killer” TB patients. *Mail and Guardian*. Available: <http://www.alertnet.org/thenews/newsdesk/L23916489.htm>. Accessed 16 March 2007.
3. Escombe AR, Oeser CC, Gilman RH, Navincopa M, Ticona E, et al. (2007) Natural ventilation for the prevention of airborne contagion. *PLoS Med* 4: e68. doi:10.1371/journal.pmed.0040068
4. Médecins Sans Frontières (2007) No time to wait: Overcoming the gaps in TB drug research and development. Summary of a symposium organized by Médecins Sans Frontières, New York, January 11–12, 2007. Available: <http://www.accessmed-msf.org/prod/publications.asp?scntid=19320071730523&contenttype=PARA&>. Accessed 26 March 2007.

**Citation:** Goemaere E, Ford N, Berman D, McDermid C, Cohen R (2007) XDR-TB in South Africa: Detention is not the priority. *PLoS Med* 4(4): e162. doi:10.1371/journal.pmed.0040162

**Copyright:** © 2007 Goemaere et al. This is an open-access article distributed under the terms of the Creative Commons Attribution License, which permits unrestricted use, distribution, and reproduction in any medium, provided the original author and source are credited.

**Funding:** The authors received no specific funding for this article.

**Competing Interests:** The authors have declared that no competing interests exist.

## Adherence to TB Treatment in Ethiopia: Why Do Patients Default?

### Hundie Tesfaye

Tuberculosis as a disease has been present in humans since antiquity, with the earliest unambiguous detection of *Mycobacterium tuberculosis* in the remains of bison dated 17,000 years before the present [1]. About 90% of those infected with TB have asymptomatic (latent) infection. One in ten latent infections may progress to active disease which, if left untreated, kills more than half of its victims [2]. In 2004, 14.6 million people had active TB and there were 8.9 million new cases and 1.7 million deaths [3], mostly in developing countries, including Ethiopia.

Shargie and Lindtjörn explain the physical lack of access to the treatment centre as the main cause of failure to adherence to therapy in 20% of patients [4]. Only 52 patients indicated they lived over 10 km from the treatment centre. It is not clear whether all the 52 are among those who failed to complete the doses. It was of interest whether all 64 patients from the urban area (near to the treatment centre) completed the treatment. Nevertheless, it might be worthwhile to compare the rate of completion of treatment of the 64 urban dwellers with those 52 individuals to support the idea that physical access to the treatment centre is the main factor for treatment adherence.

Almost half of the patients enrolled in the study earned 0–99 Ethiopian birr (approximately 0–10 US dollars) per month. However, it is not clear from the report whether all 74 (91%) who failed to complete the treatment belonged to those with low monthly income. Furthermore, the fate of those earning more than 200 birr (approximately US\$20) was not clear in terms of treatment completion. The authors reported that income had no influence on the outcomes in terms of treatment completion, despite their inclusion of cost of transport among the factors which led to incompleteness of therapy.

Unfortunately the study did not evaluate the data of family numbers and its influence on treatment adherence in relation to family income. Larger family size with inappropriate income may contribute to malnutrition, leading to drug intolerance and general malaise and finally to loss of motivation to continue the treatment course.

The authors stated there was no influence of HIV status on the defaulting of treatment, despite the known fact that more than half of the cohort studied did not volunteer for the HIV test.

Drug-resistant strains of TB have emerged and are spreading dangerously. In 2000–2004, 20% of cases were resistant to standard treatments, and 2% were also resistant to second-line drugs [5]. In spite of only one treatment



failure here, extensively drug-resistant TB may be a possible challenge in Ethiopia. Whether Ethiopia succeeds in the Stop TB Partnership's Global Plan to Stop Tuberculosis, which aims to save 14 million lives between 2006 and 2015 (see <http://www.stoptb.org/globalplan>), depends on the effectiveness of the national program, infrastructure development, peace, and good governance with sustainable development assistance from donors directed to improving the life condition of the Ethiopian people, so that the population is self-sufficient and confident enough to overcome burning issues like TB.

In conclusion, the study confirms that TB drug delivery, without implementation of anti-poverty programs and more access to public health facilities, is ineffective. ■

Hundie Tesfaye ([hundie.tesfaye@fnmotol.cz](mailto:hundie.tesfaye@fnmotol.cz))

University Hospital in Motol, Charles University  
Prague, Czech Republic

#### References

1. Rothschild BM, Martin LD, Lev G, Bercovier H, Bar-Gal GK, et al. (2001) Mycobacterium tuberculosis complex DNA from an extinct bison dated 17,000 years before the present. *Clin Infect Dis* 33: 305–311.
2. Onyebujoh P, Rook GAW (2004) World Health Organization disease watch. Focus: Tuberculosis. Available: <http://www.who.int/tdr/dw/tb2004.htm>. Accessed 21 March 2007.
3. World Health Organization (2006) Tuberculosis fact sheet 104. Global and regional incidence. Available: <http://www.who.int/mediacentre/factsheets/fs104/en/>. Accessed 21 March 2007.
4. Shargie EB, Lindtjorn B (2007) Determinants of treatment adherence among smear-positive pulmonary tuberculosis patients in southern Ethiopia. *PLoS Med* 4: e37. doi:10.1371/journal.pmed.0040037
5. Centers for Disease Control (CDC) (2006) Emergence of mycobacterium tuberculosis with extensive resistance to second-line drugs—Worldwide, 2000–2004. *MMWR Morb Mortal Wkly Rep* 55: 301–305.

**Citation:** Tesfaye H (2007) Adherence to TB treatment in Ethiopia: Why do patients default? *PLoS Med* 4(4): e165. doi:10.1371/journal.pmed.0040165

**Copyright:** © 2007 Hundie Tesfaye. This is an open-access article distributed under the terms of the Creative Commons Attribution License, which permits unrestricted use, distribution, and reproduction in any medium, provided the original author and source are credited.

**Funding:** The author received no specific funding for this article.

**Competing Interests:** The author has declared that no competing interests exist.

## Why Most Published Research Findings Are False: Problems in the Analysis

Steven Goodman, Sander Greenland

The article published in *PLoS Medicine* by Ioannidis [1] makes the dramatic claim in the title that “most published research claims are false,” and has received extensive attention as a result. The article does provide a useful reminder that the probability of hypotheses depends on much more than just the *p*-value, a point that has been made in the medical literature for at least four decades, and in the statistical literature for decades previous. This topic has renewed importance with the advent of the massive multiple testing often seen in genomics studies.

Unfortunately, while we agree that there are more false claims than many would suspect—based both on poor study design, misinterpretation of *p*-values, and perhaps analytic manipulation—the mathematical argument in the *PLoS Medicine* paper underlying the “proof” of the title’s claim has a degree of circularity. As we show in detail in a separately published paper [2], Dr. Ioannidis utilizes a mathematical model that severely diminishes the evidential value of

studies—even meta-analyses—such that none can produce more than modest evidence against the null hypothesis, and most are far weaker. This is why, in the offered “proof,” the only study types that achieve a posterior probability of 50% or more (large RCTs [randomized controlled trials] and meta-analysis of RCTs) are those to which a prior probability of 50% or more are assigned. So the model employed cannot be considered a proof that most published claims are untrue, but is rather a claim that no study or combination of studies can ever provide convincing evidence.

The two assumptions that produce the above effect are:

- 1) Calculating the evidential effect only of verdicts of “significance,” i.e.,  $p \leq 0.05$ , instead of the actual *p*-value observed in a study, e.g.,  $p = 0.001$ .
- 2) Introducing a new “bias” term into the Bayesian calculations, which even at a described “minimal” level (of 10%) has the effect of very dramatically diminishing a study’s evidential impact.

In addition to the above problems, the paper claims to have proven something it describes as paradoxical; that the “hotter” an area is (i.e., the more studies published), the more likely studies in that area are to make false claims. We have shown this claim to be erroneous [2]. The mathematical proof offered for this in the *PLoS Medicine* paper shows merely that the more studies published on any subject, the higher the absolute number of false positive (and false negative) studies. It does not show what the papers’ graphs and text claim, viz, that the number of false claims will be a higher proportion of the total number of studies published (i.e., that the positive predictive value of each study decreases with increasing number of studies).

The paper offers useful guidance in a number of areas, calling attention to the importance of avoiding all forms of bias, of obtaining more empirical research on the prevalence of various forms of bias, and on the determinants of prior odds of hypotheses. But the claims that the model employed in this paper constitutes a “proof” that most published medical research claims are false, and that research in “hot” areas is most likely to be false, are unfounded. ■

Steven Goodman ([sgoodman@jhmi.edu](mailto:sgoodman@jhmi.edu))

Johns Hopkins School of Medicine  
Baltimore, Maryland, United States of America

Sander Greenland

University of California Los Angeles  
Los Angeles, California, United States of America

#### References

1. Ioannidis JPA (2005) Why most published research findings are false. *PLoS Med* 2: e124. doi:10.1371/journal.pmed.0020124
2. Goodman S, Greenland S (2007) Assessing the unreliability of the medical literature: A response to “Why most published research findings are false”. Johns Hopkins University, Department of Biostatistics. Available: <http://www.bepress.com/jhubiostat/paper135>. Accessed 21 March 2007.

**Citation:** Goodman S, Greenland S (2007) Why most published research findings are false: Problems in the analysis. *PLoS Med* 4(4): e168. doi:10.1371/journal.pmed.0040168

**Copyright:** © 2007 Goodman and Greenland. This is an open-access article distributed under the terms of the Creative Commons Attribution License, which permits unrestricted use, distribution, and reproduction in any medium, provided the original author and source are credited.

**Funding:** The authors received no specific funding for this article.

**Competing Interests:** The authors have declared that no competing interests exist.

# Palladin Mutation Causes Familial Pancreatic Cancer: Absence in European Families

Emily Slater, Vera Amrillaeva, Volker Fendrich, Detlef Bartsch, Julie Earl, Louis J. Vitone, John P. Neoptolemos, William Greenhalf

We read with interest the article published in *PLoS Medicine* by Pogue-Geile et al. [1] reporting an apparent mutation in the KIAA0992 splice variant of the *palladin* gene in a family previously reported to have a high incidence of pancreatic cancer. Pogue-Geile and others had previously established that the 4q32–34 locus segregated with pancreatic cancer in this family by screening for pre-neoplastic lesions, which could then be used as a marker for mutation carriers [2]. In the *PLoS Medicine* paper the authors show that the mutation in *palladin* is on the 4q32–34 haplotype that segregates with the disease. The European Registry of Hereditary Pancreatitis and Familial Pancreatic Cancer (EUROPAC) and the German National Case Collection for Familial Pancreatic Cancer (FaPaCa) have recently shown that a mutation on 4q32–34 is unlikely to explain pancreatic cancer in a majority of our European families, but we did not rule out segregation with the disease in a minority of families [3].

Naturally we were keen to establish if the mutation seen in Family X from America was seen in any of our families, and so we have sequenced the locus in 74 individuals who were either affected by pancreatic cancer or who are obligate carriers (assuming autosomal dominant inheritance) of the disease mutation (in 74 families). We have also sequenced the locus in 14 affected individuals from 14 families with familial multiple mole melanoma with cases of pancreatic cancer (FAMMM-PC) [4] and nine sporadic pancreatic cancer patients of less than 50 years of age. We did not identify the mutation in any of the individuals, neither as a heterozygote or a homozygote.

This does not of course mean that other mutations in coding or non-coding regions of this variant of *palladin* or other variants are absent from European families. However, it is noteworthy that the phenotype of Family X is significantly different from the phenotype common to the families on the EUROPAC/FaPaCa registries. In particular, the incidence of diabetes in our families is relatively low, except where the diabetes is a direct consequence of development of cancer [3]. This presentation contrasts strongly with the family harbouring the *palladin* mutation [1,2], where diabetes was common. It is possible that Family X (and the association with *palladin* mutation) is not typical of the familial pancreatic cancer syndrome. ■

Emily Slater

Vera Amrillaeva

Volker Fendrich

Detlef Bartsch

German National Case Collection for Familial Pancreatic Cancer (FaPaCa)  
Städtische Kliniken Bielefeld-Mitte and The Philipps-University Marburg  
Marburg, Germany

Julie Earl

Louis J. Vitone

John P. Neoptolemos

William Greenhalf (greenhaf@liv.ac.uk)

European Registries of Familial Pancreatic Cancer (EUROPAC)  
Liverpool, United Kingdom

## References

1. Pogue-Geile KL, Chen R, Bronner MP, Crnogorac-Jurcevic T, Moyes KW, et al. (2006) *Palladin* mutation causes familial pancreatic cancer and suggests a new cancer mechanism. *PLoS Med* 3: e516. doi:10.1371/journal.pmed.0030516
2. Eberle MA, Pftutzer R, Pogue-Geile KL, Bronner MP, Crispin D, et al. (2002) A new susceptibility locus for autosomal dominant pancreatic cancer maps to chromosome 4q32–34. *Am J Hum Genet* 70: 1044–1048.
3. Earl J, Yan L, Vitone LJ, Risk J, Kemp SJ, et al. (2006) Evaluation of the 4q32–34 locus in European familial pancreatic cancer. *Cancer Epidemiol Biomarkers Prev* 15: 1948–1955.
4. Lynch HT, Brand RE, Hogg D, Deters CA, Fusaro RM, et al. (2002) Phenotypic variation in eight extended CDKN2A germline mutation familial atypical multiple mole melanoma-pancreatic carcinoma-prone families: The familial atypical mole melanoma-pancreatic carcinoma syndrome. *Cancer* 94: 84–96.

**Citation:** Slater E, Amrillaeva V, Fendrich V, Bartsch D, Earl J, et al. (2007) *Palladin* mutation causes familial pancreatic cancer: Absence in European families. *PLoS Med* 4(4): e164. doi:10.1371/journal.pmed.0040164

**Copyright:** © 2007 Slater et al. This is an open-access article distributed under the terms of the Creative Commons Attribution License, which permits unrestricted use, distribution, and reproduction in any medium, provided the original author and source are credited.

**Funding:** The authors received no specific funding for this article.

**Competing Interests:** The authors have declared that no competing interests exist.

## Training of Peer Reviewers: Validation of a 5-Point Rating Scale

Michael Callaham

We regret that in our paper in the January issue of *PLoS Medicine* [1], we failed to cite an important recent study [2] that validates a simple 5-point quality rating score virtually identical to the one we used, and which we find more efficient than scores with multiple subscales. We apologize for the omission of this helpful research. ■

Michael Callaham (mlc@medicine.ucsf.edu)

University of California San Francisco  
San Francisco, California, United States of America

## References

1. Callaham ML, Tercier J (2007) The relationship of previous training and experience of journal peer reviewers to subsequent review quality. *PLoS Med* 4: e40. doi:10.1371/journal.pmed.0040040
2. Landkroon AP, Euser AM, Veeken H, Hart W, Overbeke AJ (2006) Quality assessment of reviewers' reports using a simple instrument. *Obstet Gynecol* 108: 979–985.

**Citation:** Callaham M (2007) Training of peer reviewers: Validation of a 5-point rating scale. *PLoS Med* 4(4): e166. doi:10.1371/journal.pmed.0040166

**Copyright:** © 2007 Michael Callaham. This is an open-access article distributed under the terms of the Creative Commons Attribution License, which permits unrestricted use, distribution, and reproduction in any medium, provided the original author and source are credited.

**Funding:** The author received no specific funding for this article.

**Competing Interests:** The author has declared that no competing interests exist.

## PLoS Medicine and Publication Ethics: When Is It Research?

Mary Ann Baily

I read this editorial with interest [1]. The issues discussed under the heading “Is a Program Description a Research

Paper?” are closely related to the subject matter of a recently completed Hastings Center project funded by the Agency for Healthcare Research and Quality.

The project was carried out by a group of distinguished participants with expertise in medicine, law, nursing, quality improvement methods, research ethics, medical editing and publishing, health services research, and health policy and regulation. It addressed the ethics of using quality improvement (QI) methods to improve health care quality and safety, and we spent considerable time on the vexing question of when (if ever) QI activities meet the regulatory definition of research and should be submitted to an Institutional Review Board (IRB) for ethical review. We also discussed the relationship between publication and IRB review.

Our analysis would lead to the same conclusion that was reached in the editorial: that the particular case example was not research and did not require IRB review. Readers might find the report’s reasoning on the issues interesting, however—and also useful in assessing other cases.

Both the project report [2] and a book of background papers [3] have been published, and they can be downloaded in PDF form at no charge from the Web site of The Hastings

Center (<http://www.thehastingscenter.org>) or the Institute for Healthcare Improvement (<http://www.ihl.org>). ■

Mary Ann Baily ([bailym@thehastingscenter.org](mailto:bailym@thehastingscenter.org))

The Hastings Center  
Garrison, New York, United States of America

#### References

1. The PLoS Medicine Editors (2007) PLoS Medicine’s advisory group on publication ethics. *PLoS Med* 4: e81. doi:10.1371/journal.pmed.0040081
2. Baily MA, Bottrell M, Lynn J, Jennings B (2006) The ethics of using QI methods to improve health care quality and safety. *Hastings Center Report Special Report*. Volume 36, Number 4. Available: <http://www.thehastingscenter.org/news/health-care-quality-improvement-ethical-regulatory-issues.asp>. Accessed 21 March 2007.
3. Jennings B, Baily MA, Bottrell M, Lynn J (2007) Health care quality improvement: Ethical and regulatory issues. The Hastings Center. Available: <http://www.thehastingscenter.org/news/health-care-quality-improvement-ethical-regulatory-issues.asp>. Accessed 21 March 2007.

**Citation:** Baily MA (2007) PLoS Medicine and publication ethics: When is it research? *PLoS Med* 4(4): e169. doi:10.1371/journal.pmed.0040169

**Copyright:** © 2007 Mary Ann Baily. This is an open-access article distributed under the terms of the Creative Commons Attribution License, which permits unrestricted use, distribution, and reproduction in any medium, provided the original author and source are credited.

**Funding:** The author received no specific funding for this article.

**Competing Interests:** The author has declared that no competing interests exist.
